# Supplementary material
Source: PubMed Central journal article supplement (PMC4959175)
Supplement: AEM.00725-16_zam999117201so1.pdf [file AEM.00725-16_zam999117201so1.pdf]

## Supporting material

### **tRNA-dependent aminoacylation of an amino-sugar intermediate in the biosynthesis of a streptothricin-related antibiotic**

Chitose Manuyama<sup>a§</sup>, Haruka Niikura<sup>a§</sup>, Miho Izumikawa<sup>b</sup>, Junko Hashimoto<sup>b</sup>, Kazuo Shinya<sup>c</sup>, Mamoru Komatsu<sup>d</sup>, Haruo Ikeda<sup>d</sup>, Makoto Kuroda<sup>e</sup>, Tsuyoshi Sekizuka<sup>e</sup>, Jun Ishikawa<sup>e</sup>, Yoshimitsu Hamano<sup>a\*</sup>

Department of Bioscience, Fukui Prefectural University, 4-1-1 Matsuoka-Kenjojima, Eiheiji-Cho, Yoshida-Gun, Fukui 910-1195, Japan<sup>a</sup>; Japan Biological Informatics Consortium (JBIC), 2-4-7 Aomi, Koto-ku, Tokyo 135-0064, Japan<sup>b</sup>; National Institute of Advanced Industrial Science and Technology, 2-4-7 Aomi, Koto-ku, Tokyo 135-0064, Japan<sup>c</sup>; Kitasato Institute for Life Sciences, Kitasato University, 1-15-1 Kitasato, Minami-ku, Sagamihara, Kanagawa 252-0373, Japan<sup>d</sup>; National Institute of Infectious Diseases, 1-23-1 Toyama, Shinjuku-ku, Tokyo 162-8640, Japan<sup>e</sup>

\*Address correspondence to Yoshimitsu Hamano, hamano@fpu.ac.jp

§These authors contributed equally to this research.

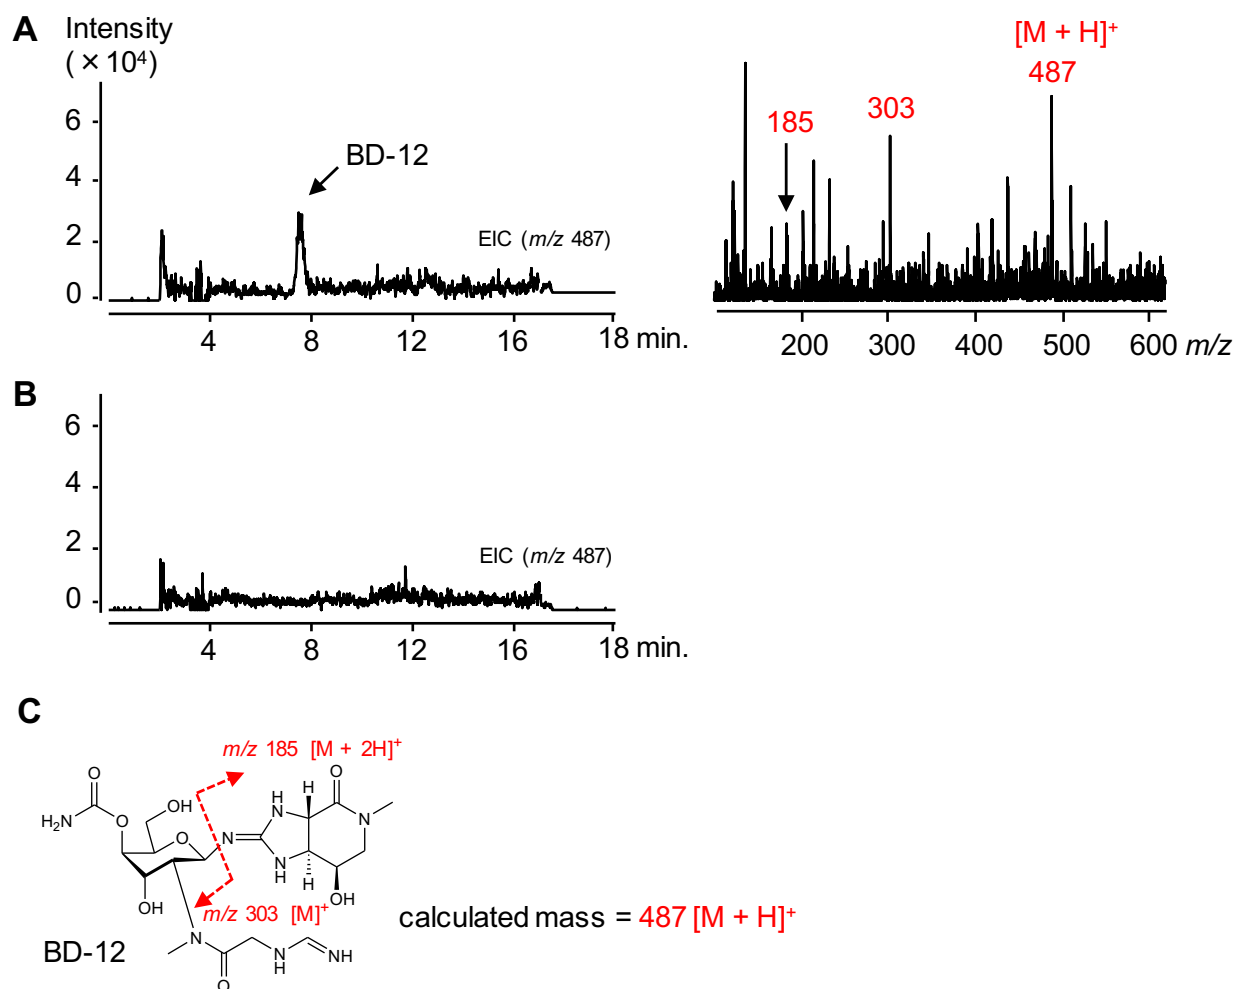

**Fig. S1** HPLC/ESI-MS analysis of BD-12 produced by the *Streptomyces* strains. *S. avermitilis* SUKA17 harboring pKU493A-BD12 (A) and *S. avermitilis* SUKA17 harboring the empty vector (pKU493A\_aac(3)IV) (B) were cultivated, and the culture broths were analyzed by HPLC/ESI-MS (Esquire 4000; Bruker, Billerica, MA, USA) using a reversed-phase column (Sunniest RP-AQUA, 3  $\mu$ m, 100  $\times$  2.0 mm; ChromaNik Technologies) at 30  $^{\circ}$ C at a flow rate of 0.3 ml min $^{-1}$  and with an initial gradient of 8% (v/v) acetonitrile in water to 16% (v/v) acetonitrile over 11 min, which was then ramped to 40% (v/v) acetonitrile over 5 min. Both acetonitrile and water contained 0.05% (v/v) HFBA and 0.05% (v/v) FA. Extracted ion chromatograms (EICs) for BD-12 ( $m/z$  487) are shown. The BD-12 chemical structure with the fragmentation pattern is also shown (C).

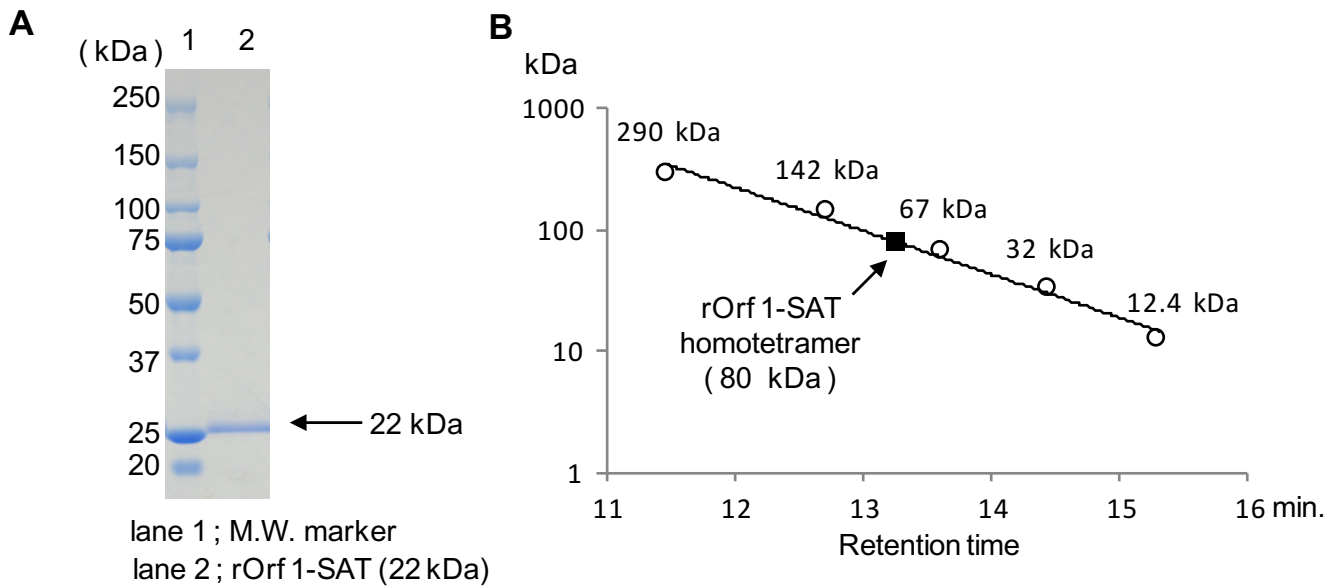

**Fig. S2** Enzymatic characterization of rOrf 1-SAT. (A) The purified rOrf 1-SAT was subjected to SDS-PAGE. Proteins were stained with CBB R-250. (B) The relative molecular mass of rOrf 1-SAT was estimated by gel-filtration chromatography (SunSec Diol, 4  $\mu$ m, 300  $\times$  4.6 mm, ChromaNik Technologies, Osaka, Japan). Glutamate dehydrogenase (290 kDa), lactate dehydrogenase (142 kDa), enolase (67 kDa), myokinase (32 kDa), and cytochrome C (12.4 kDa) were used as the standard molecular masses.

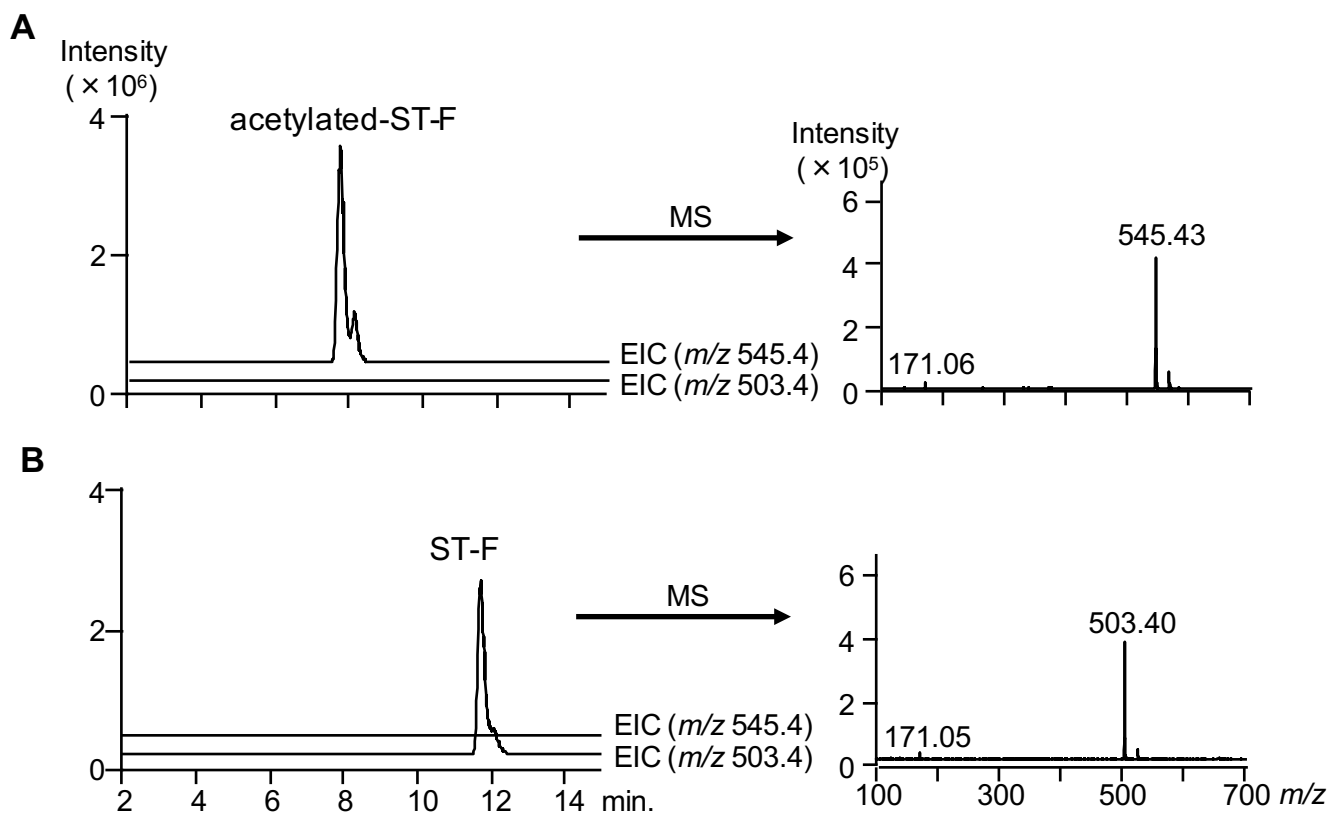

**Fig. S3** Acetylation of ST-F by rOrf 1-SAT. (A) ST-F was incubated with rOrf 1-SAT and acetyl-CoA. (B) ST-F was incubated only with rOrf 1-SAT (no acetyl-CoA). These two reaction mixtures were analyzed by HPLC/ESI-MS. The extracted ion chromatograms (EICs) for ST-F ( $m/z$  503.4) and acetylated-ST-F ( $m/z$  545.4) are shown.
